# Supplementary material for: Non-equilibrium plasma-assisted dry reforming of methane over shape-controlled CeO2 supported ruthenium catalysts
Source: Royal Society of Chemistry journal article supplement (doi:10.1039/d3ta01196h), 2023-01-01
Supplement: d3ta01196h1.pdf [file d3ta01196h1.pdf]

## Non-equilibrium plasma-assisted dry reforming of methane over shape-controlled CeO<sub>2</sub> supported ruthenium catalysts

Md Robayet Ahasan,<sup>1</sup> Monir Hossain,<sup>1</sup> Xiang Ding,<sup>2</sup> and Ruigang Wang<sup>1\*</sup>

\*Email: [rwang@eng.ua.edu](mailto:rwang@eng.ua.edu)

<sup>1</sup>Department of Metallurgical and Materials Engineering, The University of Alabama, Tuscaloosa, AL 35487, United States

<sup>2</sup>College of Urban and Environmental Sciences, Peking University, Beijing 100871, China

**Table S1 H<sub>2</sub> consumption, and reduction temperature of the prepared samples and their crystalline size from the XRD and H<sub>2</sub>-TPR profiles.**

| Sample                          | Crystal size (nm) | BET surface area (m <sup>2</sup> /g) | H <sub>2</sub> Consumption (mmol/g) |                     | Total | Peak temperature (°C) |     |     |
|---------------------------------|-------------------|--------------------------------------|-------------------------------------|---------------------|-------|-----------------------|-----|-----|
|                                 |                   |                                      | O <sub>s</sub> peak                 | O <sub>b</sub> peak |       | α                     | β   | γ   |
| 1 wt% Ru/ SiO <sub>2</sub> -o   | 14.8              | 198.2                                | 5.32                                | 25.54               | 30.86 | 146                   | N/A | 517 |
| 1 wt% Ru/ SiO <sub>2</sub> -r   | 10.5              | 255.7                                | 1.01                                | 27.53               | 28.54 | 57                    | N/A | 532 |
| 1 wt% Ru/ CeO <sub>2</sub> NR-o | 7.0               | 73.9                                 | 27.93                               | 1.96                | 29.89 | 105                   | 129 | 731 |
| 1 wt% Ru/ CeO <sub>2</sub> NR-r | 7.2               | 100.3                                | 22.39                               | 7.74                | 30.13 | 82                    | 343 | 753 |
| 1 wt% Ru/ CeO <sub>2</sub> NC-o | 19.8              | 41.2                                 | 28.17                               | 1.72                | 29.89 | 115                   | 158 | 721 |
| 1 wt% Ru/ CeO <sub>2</sub> NC-r | 19.9              | 54.9                                 | 8.92                                | 20.46               | 29.38 | 67                    | 265 | 743 |

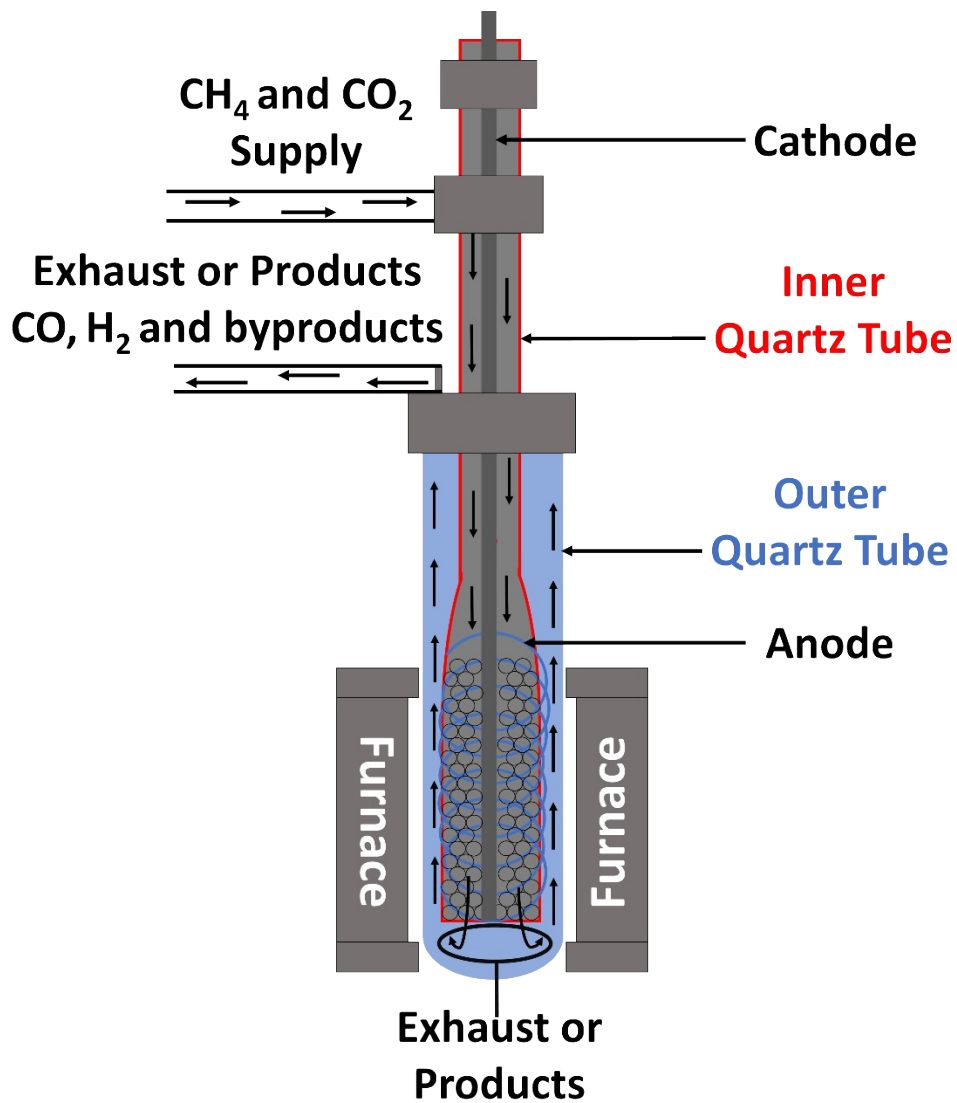

Fig. S1 Zoomed figure of the central part of DBD reactor.

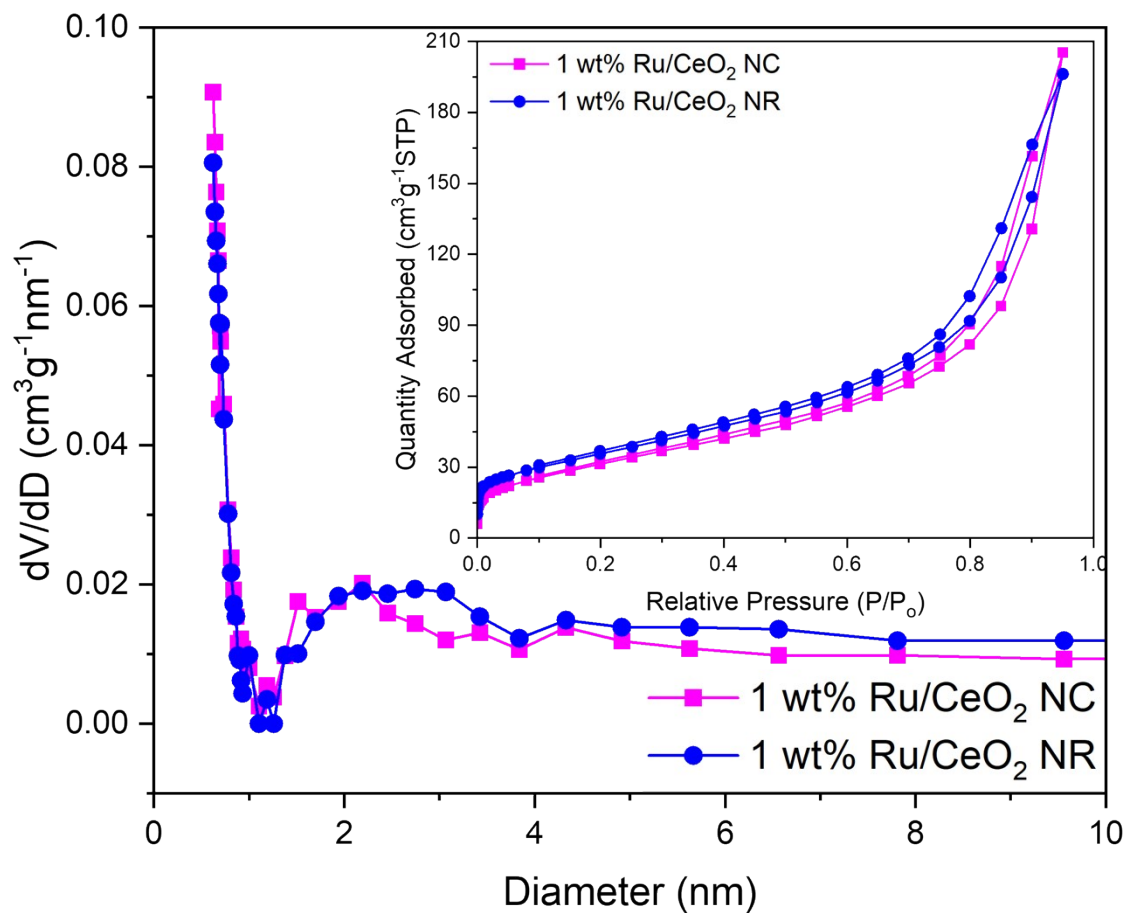

**Fig. S2** N<sub>2</sub> adsorption/desorption and pore size distribution of 1 wt% Ru/CeO<sub>2</sub> NC and 1 wt% Ru/CeO<sub>2</sub> NR catalysts.

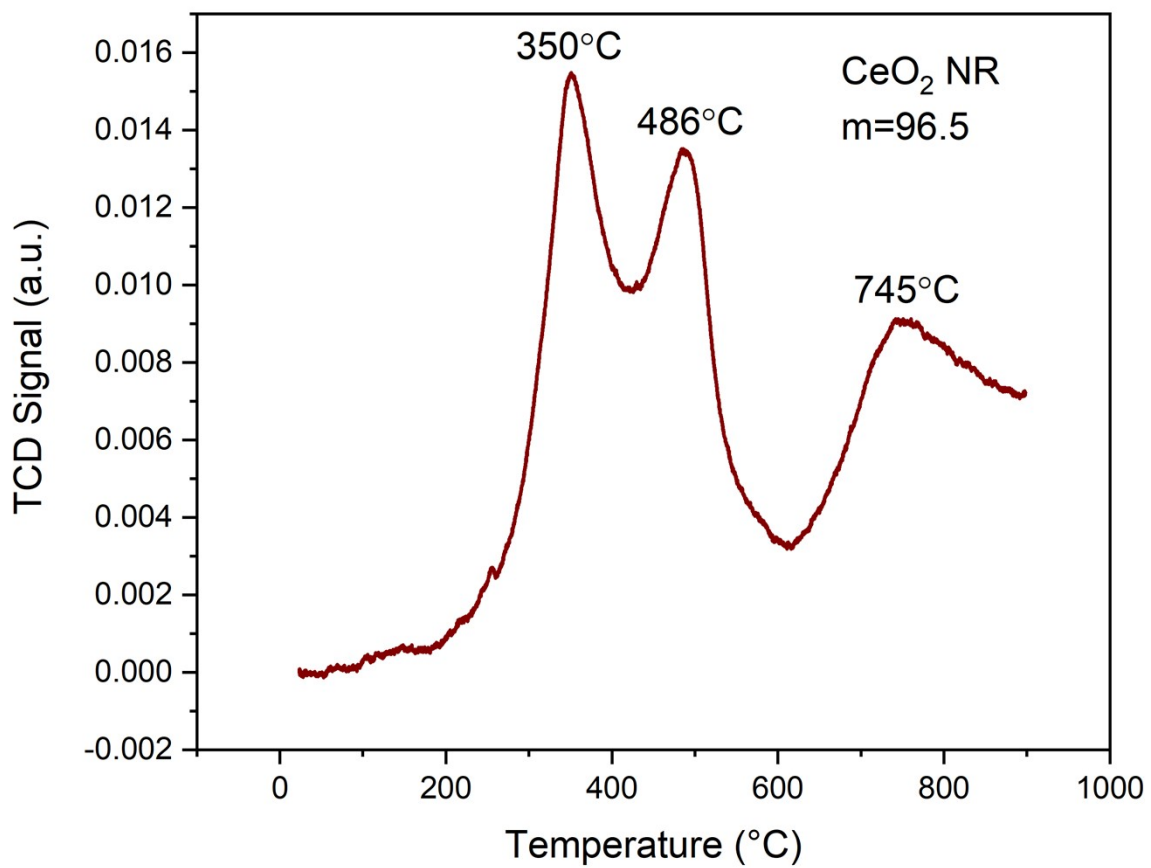

**Fig. S3 H<sub>2</sub>-TPR profiles of CeO<sub>2</sub> NR.**

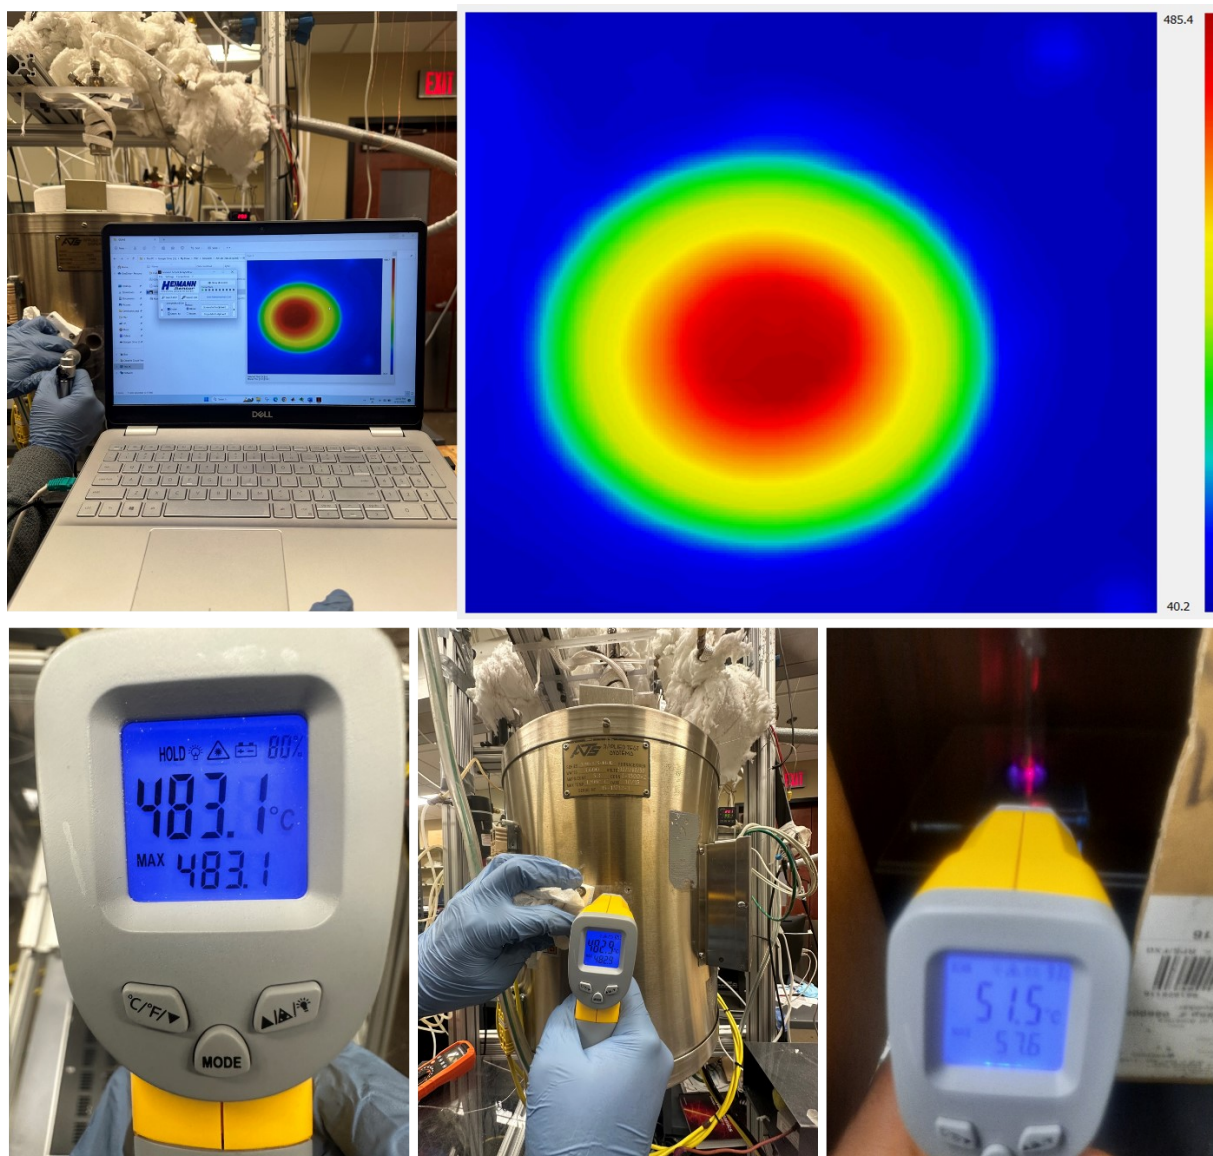

**Fig. S4 Measurement of temperature at plasma catalytic reaction zone with thermopile infrared array sensor and infrared thermometer.**

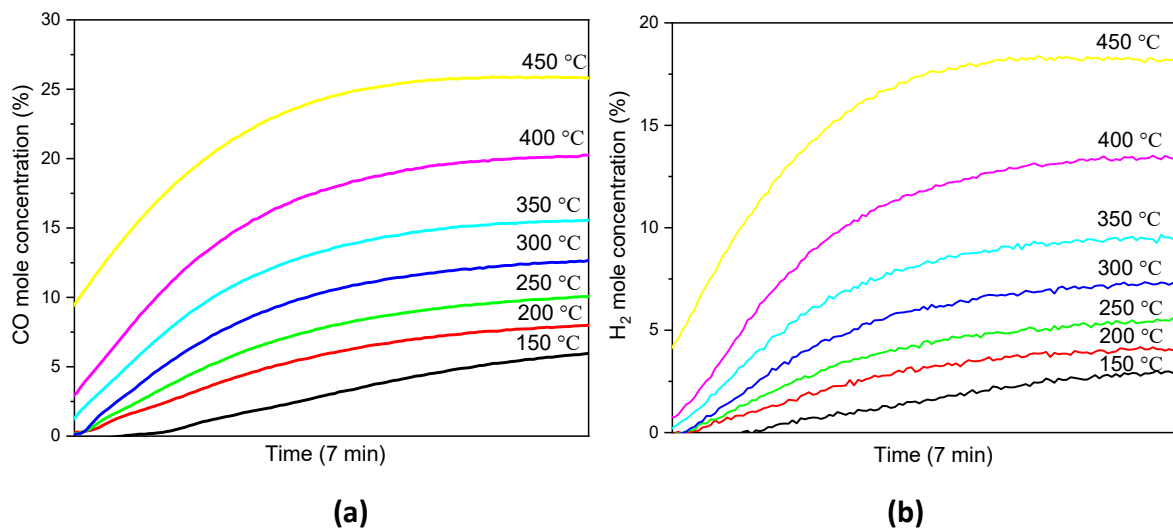

**Fig. S5 CO (a) and H<sub>2</sub> (b) molar concentration with time at temperature from 150 °C to 450 °C by the 1 wt% Ru/CeO<sub>2</sub> NR-r catalyst in plasma assisted DRM reaction.**

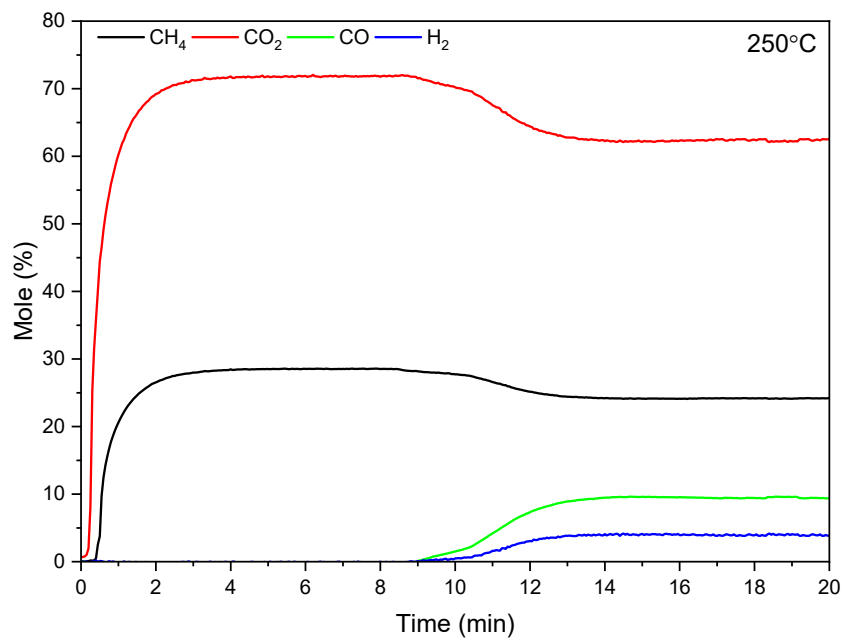

**Fig. S6** Variation of gas species concentration with reaction time at 250 °C for 1 wt% Ru/CeO<sub>2</sub> NR-r catalyst.

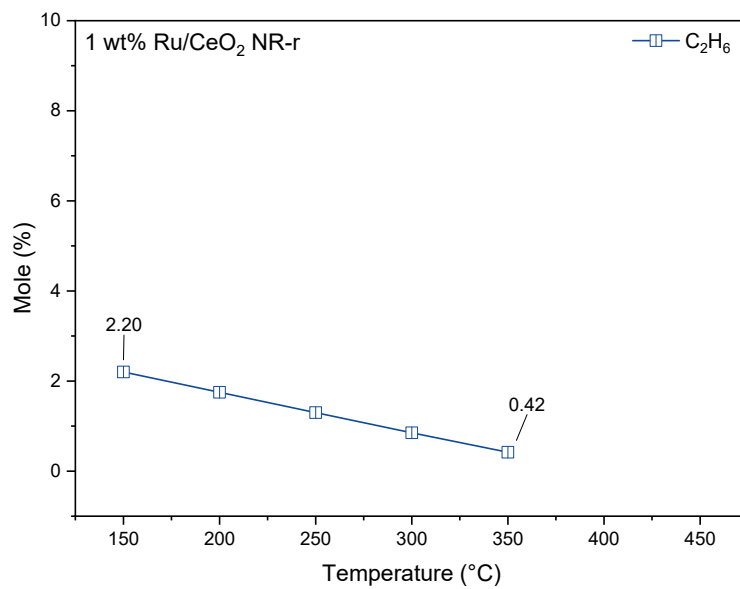

**Fig. S7** C<sub>2</sub>H<sub>6</sub> formation by 1 wt% Ru/CeO<sub>2</sub> NR-r catalyst in plasma assisted DRM reaction.

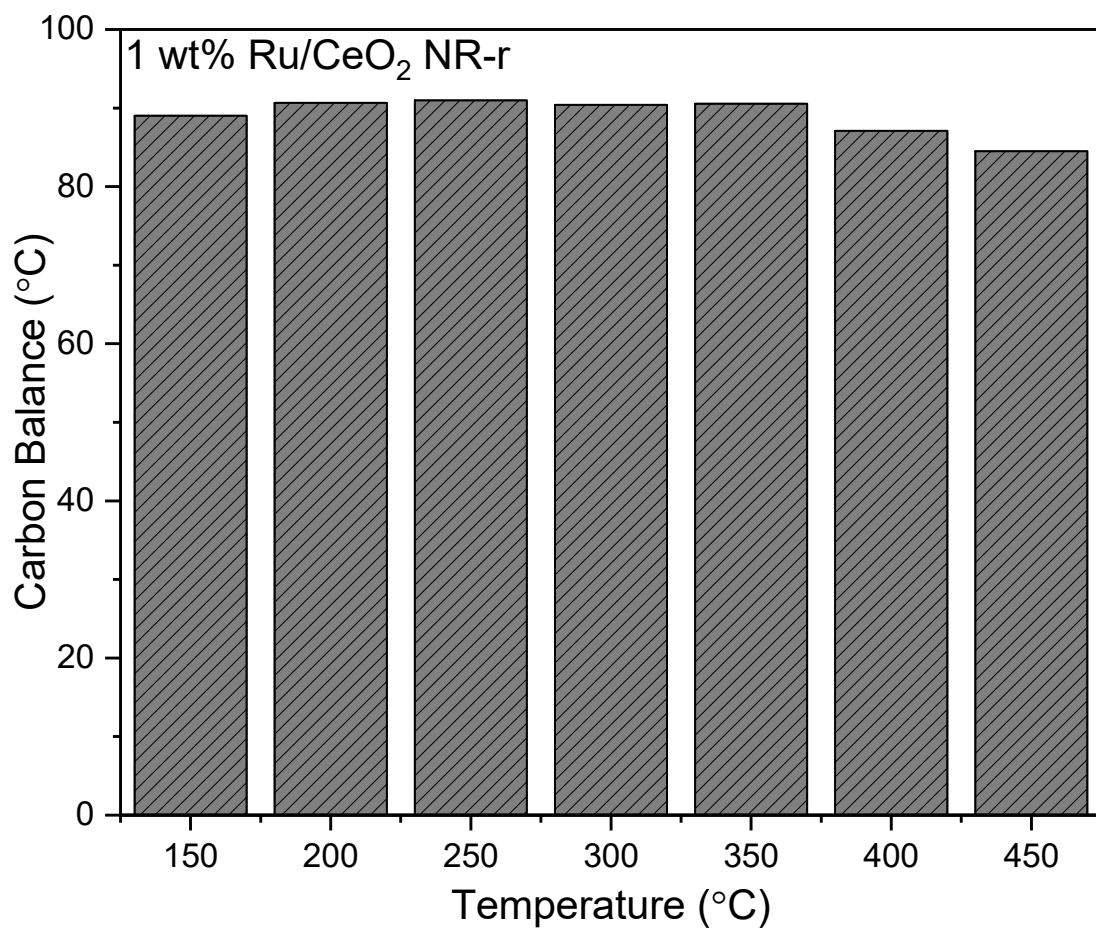

**Fig. S8 Carbon balance of 1 wt% Ru/CeO<sub>2</sub> NR-r.**



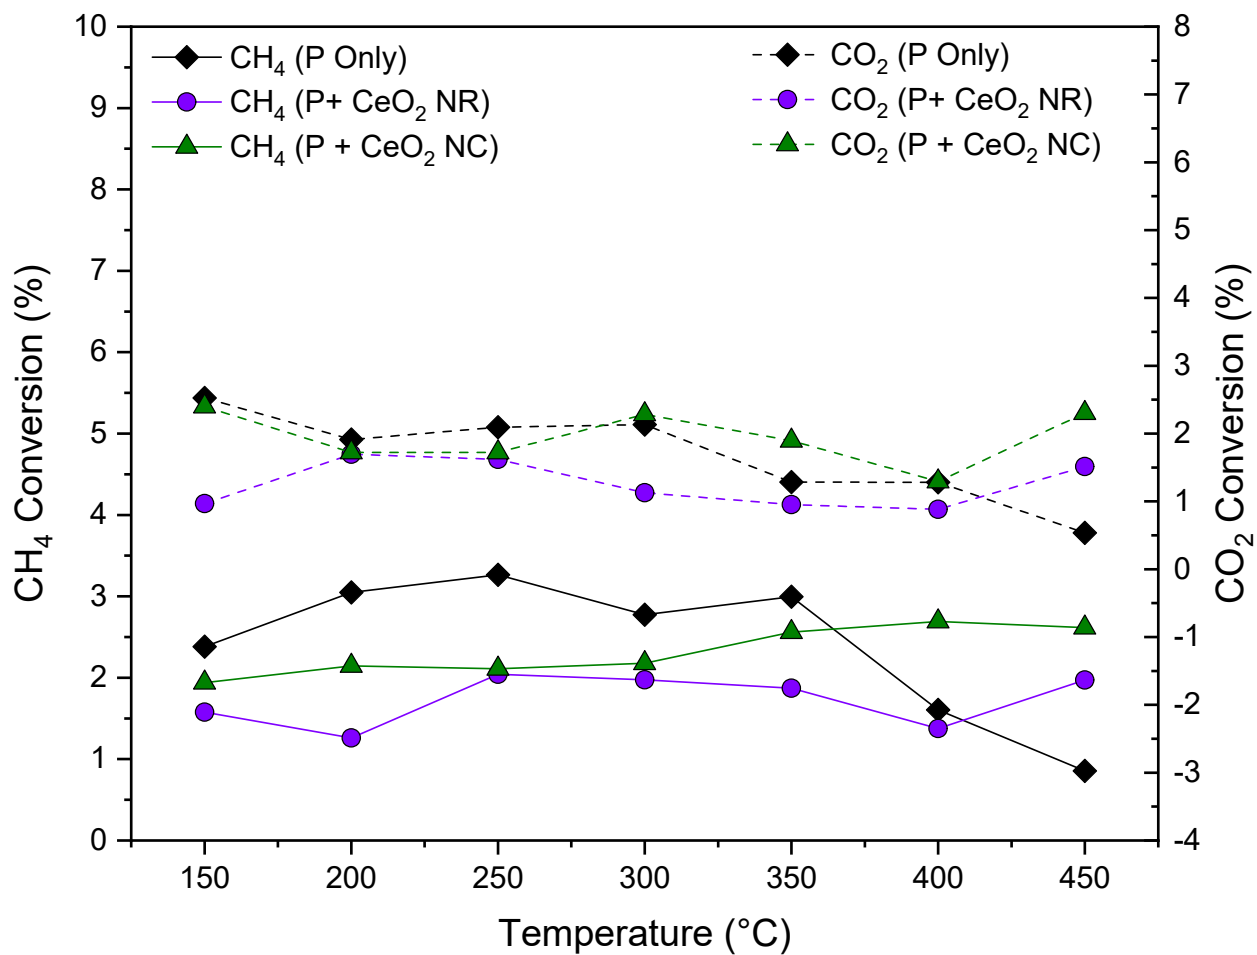

**Fig. S9 CH<sub>4</sub> and CO<sub>2</sub> conversion of only plasma (without catalysts) and plasma + bare CeO<sub>2</sub> NP from 150 °C to 450 °C. (Catalyst wt.: ~200 mg, Power: 10.2 to 13.6 W, Flowrate: CO<sub>2</sub>: 250 sccm and CH<sub>4</sub>: 100 sccm).**

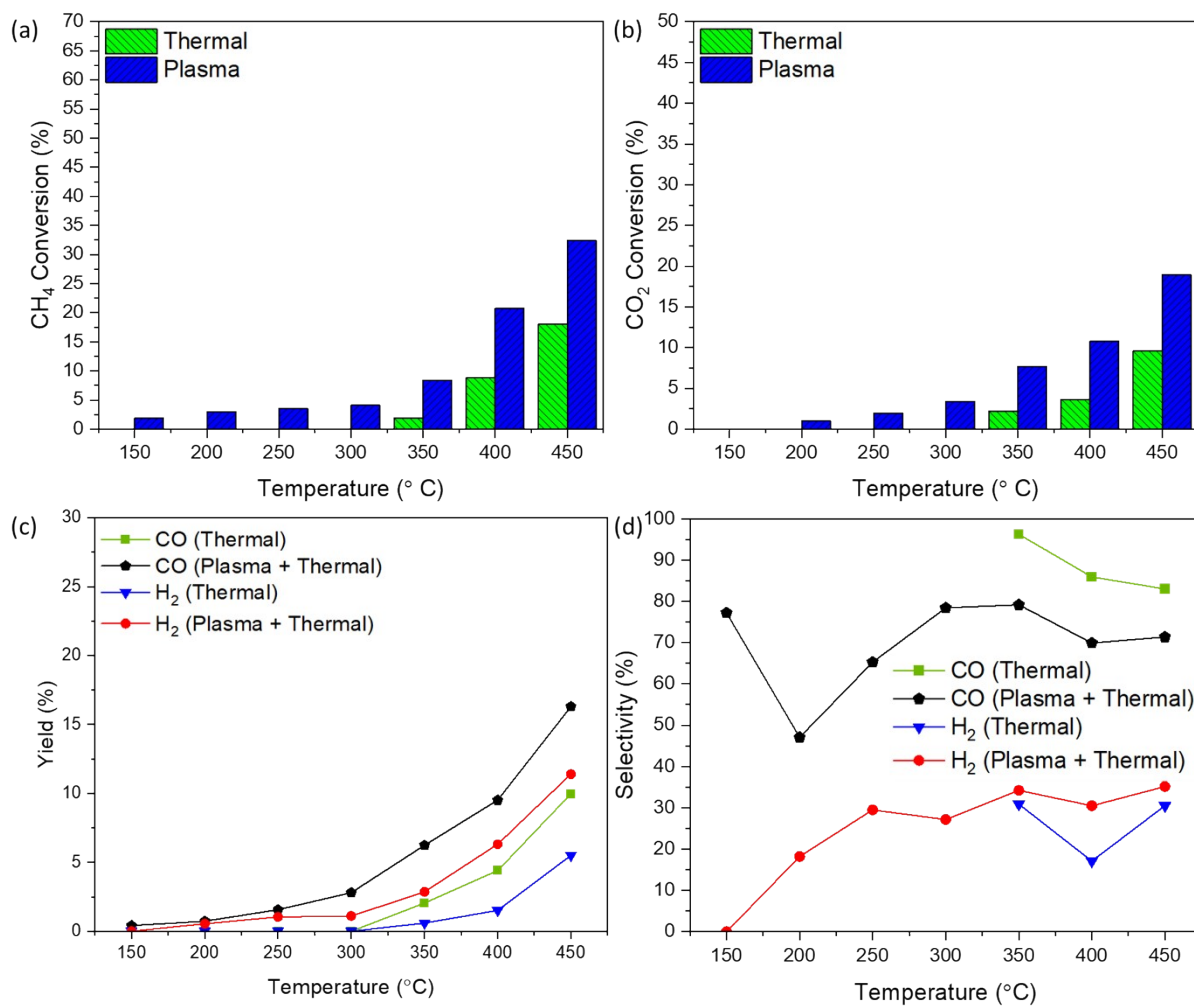

**Fig. S10 (a) CH<sub>4</sub> and (b) CO<sub>2</sub> conversion of 1 wt% Ru/SiO<sub>2</sub> NC; (c) CO and H<sub>2</sub> Yield and (d) selectivity of 1 wt% Ru/SiO<sub>2</sub> from 150 °C to 450 °C under thermal and thermal + plasma conditions. (Catalyst weight: ~200 mg; power: 10.2 to 13.6 W; frequency: 20 kHz; flowrate: CO<sub>2</sub>: 250 sccm and CH<sub>4</sub>: 100 sccm).**

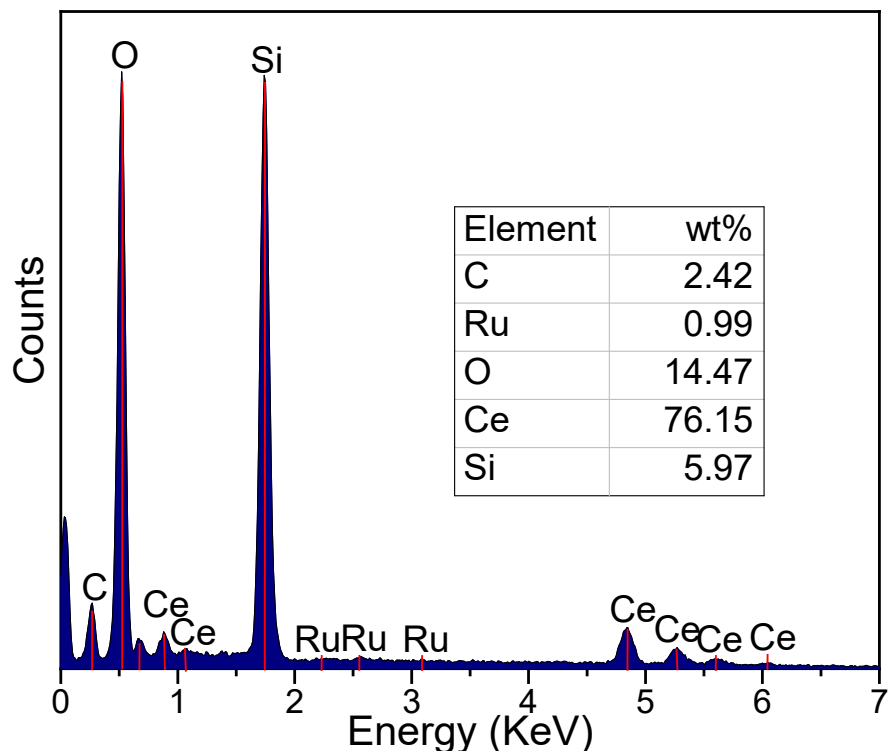

**Fig. S11 EDX profile of used 1 wt% Ru/CeO<sub>2</sub> NR-r catalyst.**

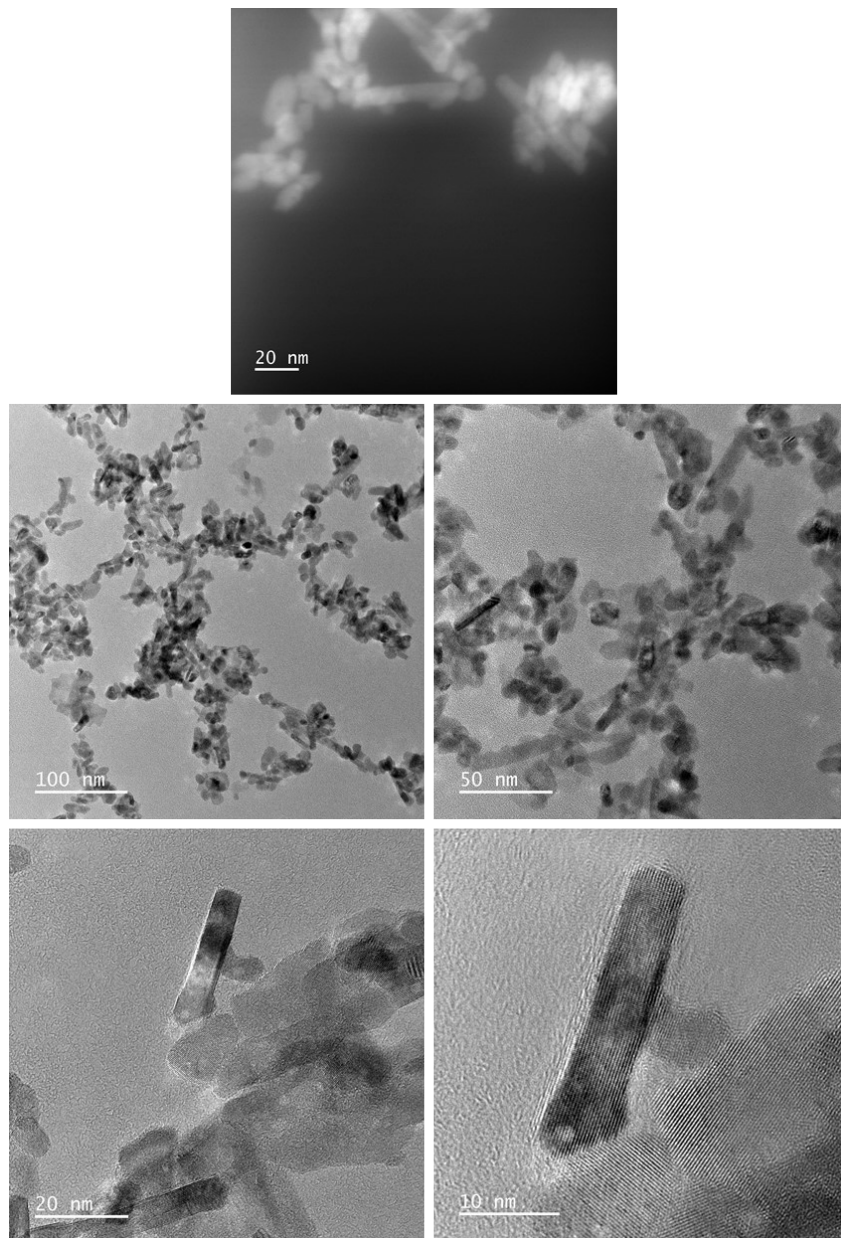

**Fig. S12 STEM and HRTEM images of the spent 1 wt% Ru/CeO<sub>2</sub> NR-r catalyst.**
